# Supplementary material for: Mapping DNA cleavage by the Type ISP restriction-modification enzymes following long-range communication between DNA sites in different orientations
Source: PubMed Central journal article supplement (PMC4666363; doi:10.1093/nar/gkv1129), 2015-10-26
Supplement: supp_gkv1129_nar-02629-h-2015-File011.pdf [file supp_gkv1129_nar-02629-h-2015-File011.pdf]

Supplementary Information to

**The nuclease domains of Type ISP restriction enzymes are indirectly activated  
at-a-distance by strain produced by motor activity**

Kara van Aelst<sup>1</sup>, Kayarat Saikrishnan<sup>2</sup> and Mark D. Szczelkun<sup>1</sup>

<sup>1</sup>DNA-Protein Interactions Unit, School of Biochemistry, University of Bristol, Bristol, BS8  
1TD, UK, and <sup>2</sup>Division of Biology, Indian Institute of Science Education and Research, Pune,  
411008, India

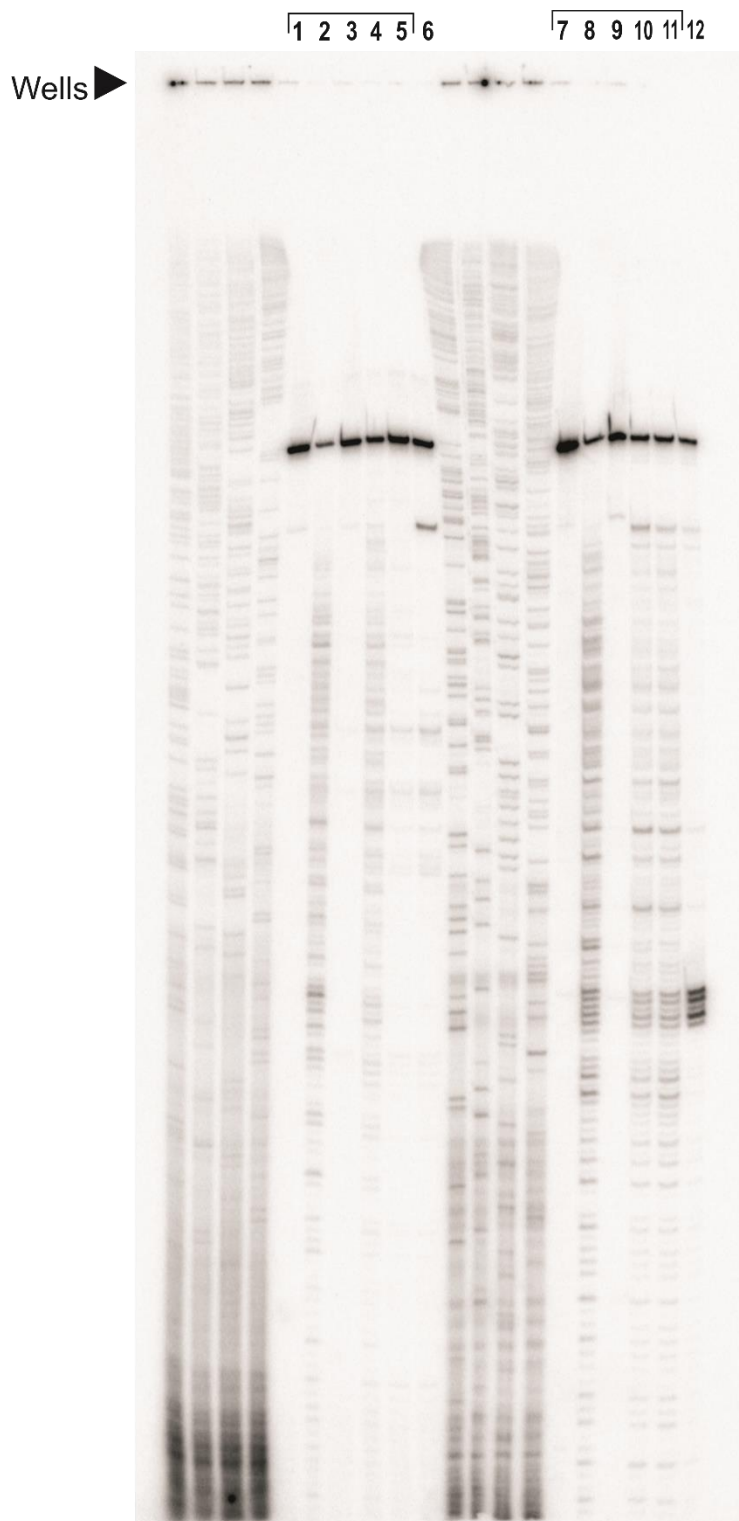

**Supplementary Figure S1.** Complete denaturing polyacrylamide gels used in Figure 5. Lanes 1-5 were deleted from the image for clarity. Lanes 6 (“bottom” strand) and 12 (“top” strand) are the samples lanes shown.
